# Supplementary material for: The Impact of Diet and Fibre Fractions on Plasma Adipocytokine Levels in Prediabetic Adults
Source: MDPI journal article supplement (doi:10.3390/nu13020487), 2021-02-02
Supplement: s1 [file s1]

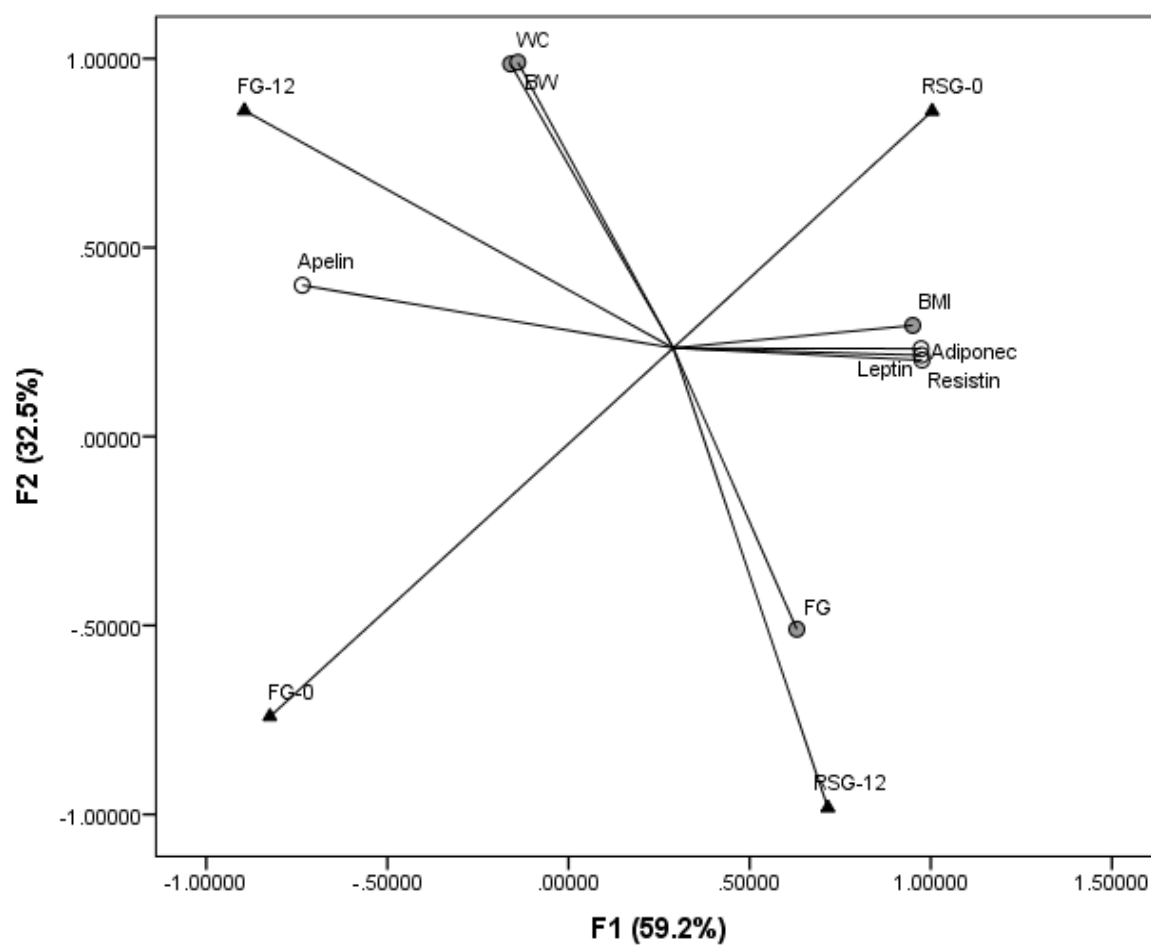

Figure S1. Interdependence between anthropometrics parameters (body mass index - BMI, body weight - BW and waist circumference WC) and adipokine levels in RS (RSG) and Fibre group (FG) at the beginning (RSG-0 and FG-0) and end of the study (RSG-12 and FG-12)
