# Supplementary material for: The Impact of Diet and Fibre Fractions on Plasma Adipocytokine Levels in Prediabetic Adults
Source: MDPI journal article supplement (doi:10.3390/nu13020487), 2021-02-02
Supplement: s1 [file s1]

A

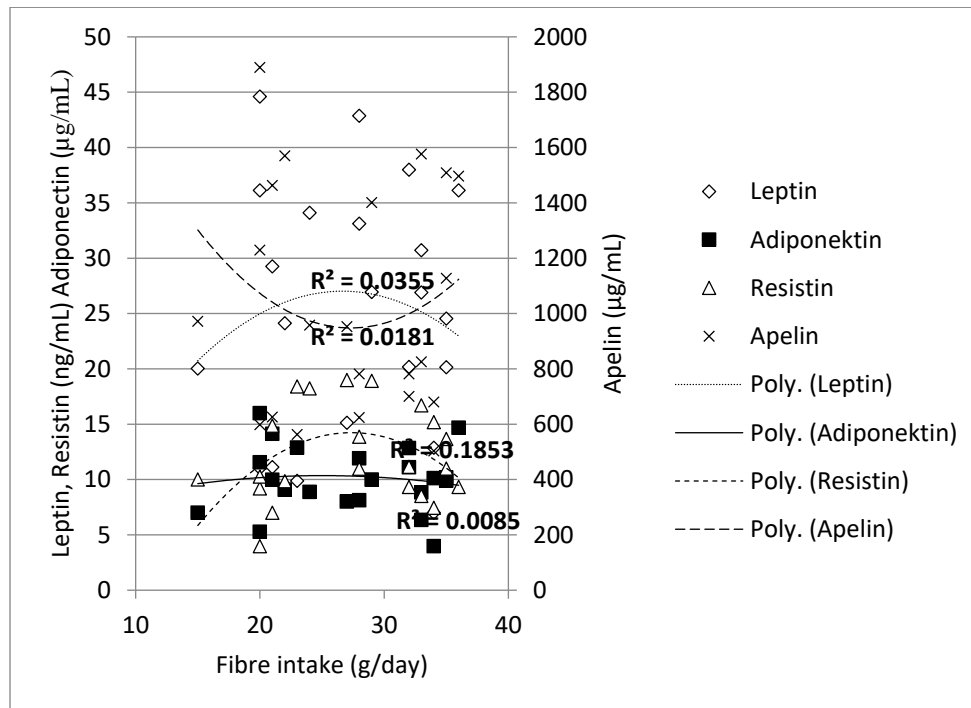

B

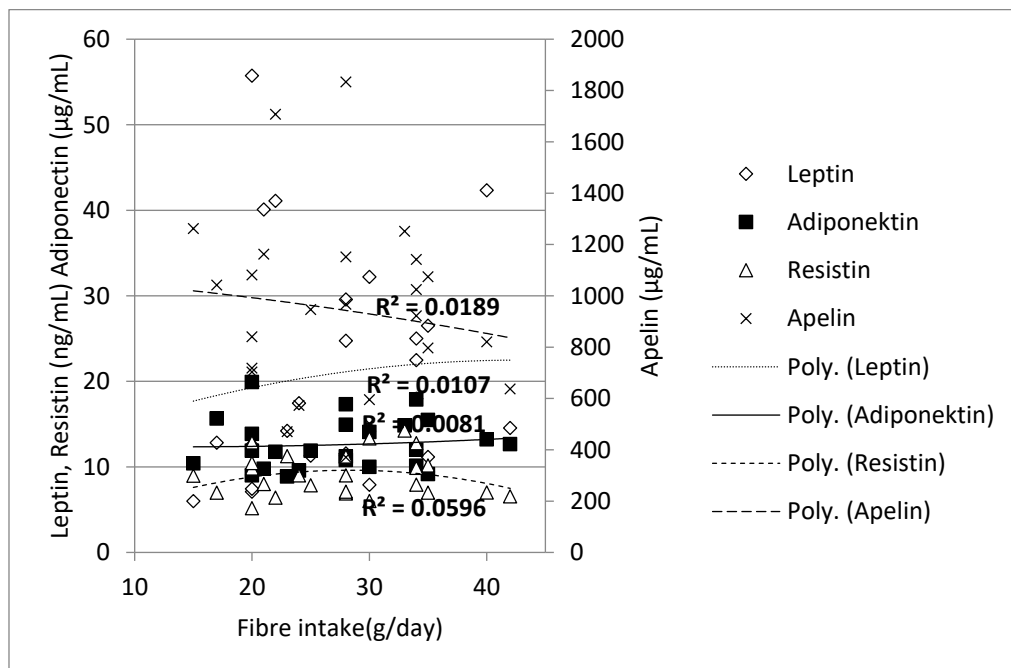

C

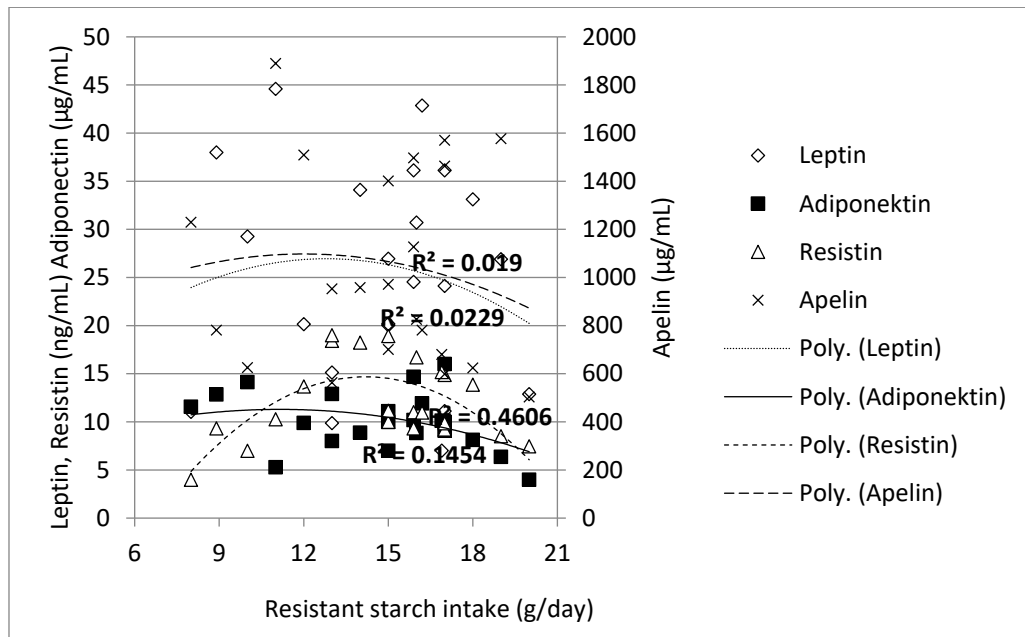

D

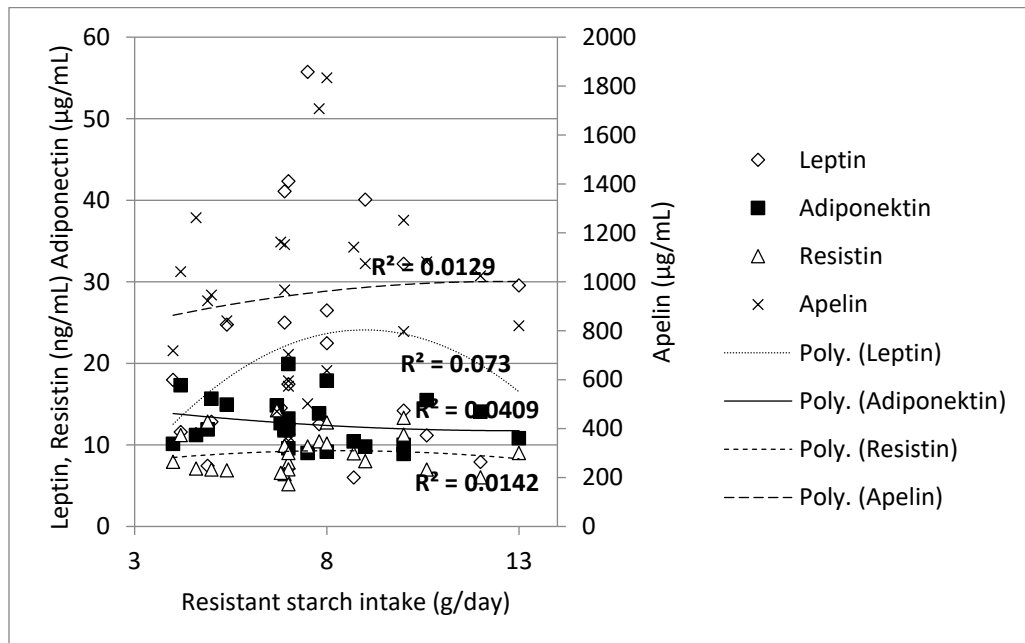

Figure S2 (A, B, C, D). Interdependence between fibre intake, resistant starch intake and different adipocytokine level (leptin, adiponectin, resistin and apelin), presented as polynomial regression in RS group (A, C) and Fibre group (B, D).
